# Supplementary material
Source: publisher site journal article supplement (https://www.spandidos-publications.com/3475/downloadSupplementary)

Figure S1. AdipoR1 and APPL1 are downregulated in siRNA-transfected H9c2 cells. (A) Relative expression levels of adiponectin following transfection with Ov-adiponectin. (B) Relative expression levels of AdipoR1 after transfection with si-AdipoR1. (C) Relative expression levels of APPL1 following transfection with si-APPL1. \*\*\* $P < 0.001$  vs. control. AdipoR1, adiponectin receptor 1; APPL1, adaptor protein phosphotyrosine interacting with PH domain and leucine zipper 1; NC, negative control; Ov-, overexpression; si-, small interfering RNA.

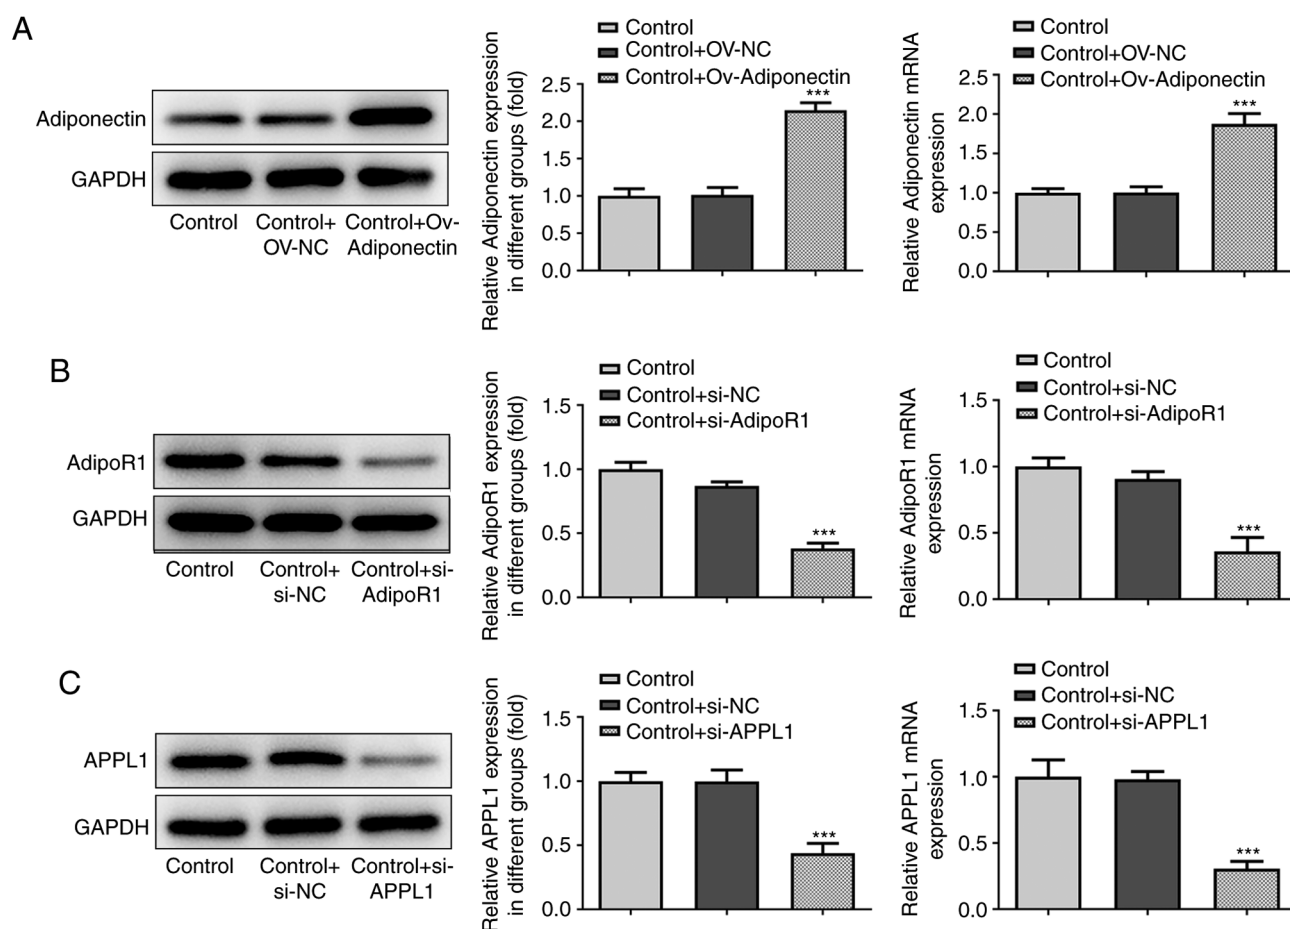

Supplement: Supplementary file 1 [file downloadSupplementary]
